# Supplementary material
Source: HighWire-hosted journal article supplement (https://bmjopen.bmj.com/content/14/12/e090527)

Supplemental Table 2: Social Work Settings, Collaborators, and Patient Concerns Stratified by Country

| Country                 | Setting                                                                                                        | Communication                                                                                                                                                                                                                                                                                                                                | Collaborators                                                                                                                                                                                                                                                                                                                                                                                                                                                                                                                                                                                                                                                                                                                                                                                                 | Health Concerns   Populations Served*                                                                                                                                                                                                                                                                                                                                                                                                                                                                                                                                                                                                                                                                                                                                              | Social Concerns                                                                                                                                                                                                                                                                                                                                                                                                                                                                                                                    |
|-------------------------|----------------------------------------------------------------------------------------------------------------|----------------------------------------------------------------------------------------------------------------------------------------------------------------------------------------------------------------------------------------------------------------------------------------------------------------------------------------------|---------------------------------------------------------------------------------------------------------------------------------------------------------------------------------------------------------------------------------------------------------------------------------------------------------------------------------------------------------------------------------------------------------------------------------------------------------------------------------------------------------------------------------------------------------------------------------------------------------------------------------------------------------------------------------------------------------------------------------------------------------------------------------------------------------------|------------------------------------------------------------------------------------------------------------------------------------------------------------------------------------------------------------------------------------------------------------------------------------------------------------------------------------------------------------------------------------------------------------------------------------------------------------------------------------------------------------------------------------------------------------------------------------------------------------------------------------------------------------------------------------------------------------------------------------------------------------------------------------|------------------------------------------------------------------------------------------------------------------------------------------------------------------------------------------------------------------------------------------------------------------------------------------------------------------------------------------------------------------------------------------------------------------------------------------------------------------------------------------------------------------------------------|
| United States (n = 126) | Colocation (n = 88)<br>Multisite (Off-Site) (n = 17)<br>Multisite (Not stated) (n = 12)<br>Not stated (n = 25) | Collaboration but not specified (n = 59)<br>Communication via EMR (n = 13)<br>External Referrals (Off site) (n = 8)<br>Formal collaboration in team meetings (n = 26)<br>Formal consultation (n = 38)<br>Informal consultations (n = 22)<br>Internal Referrals (n = 35)<br>No mention of collaboration (n = 9)<br>Other <sup>1</sup> (n = 3) | Administrative Staff (non-leadership) (n = 14)<br>Attorneys/Legal (n = 3)<br>Care coordinator (n = 13)<br>Case Manager (n = 6)<br>Community Health Worker (n = 5)<br>Dietitian (n = 13)<br>Health Promotor (n = 1)<br>Manager/Director (n = 3)<br>Mental Health Provider (NOS) (n = 12)<br>Not stated (n = 21)<br>Nurse (n = 71)<br>Nurse practitioner (n = 41)<br>Occupational therapist (n = 8)<br>Other <sup>2</sup> (n = 7)<br>Paediatrician (n = 15)<br>Pharmacist (n = 32)<br>Physician Assistant (n = 22)<br>Physiotherapist (n = 7)<br>Primary care physician (n = 86)<br>Psychiatrist (n = 21)<br>Psychologist (n = 20)<br>Religious Leaders (n = 3)<br>Resident/IHP <sup>3</sup> Trainee (n = 3)<br>Specialist Physician (NOS) (n = 5)<br>Speech-Language Pathologist (n = 1)<br>Volunteers (n = 1) | Addictions and Substance Use (n = 42)<br>Anxiety (n = 34)<br>Cancer (n = 2)<br>Caregivers (n = 7)<br>Children & Youth (n = 12)<br>Chronic Disease (General) (n = 42)<br>Chronic Pain (n = 4)<br>Complexity (n = 30)<br>COVID-19 (n = 6)<br>Depression (n = 54)<br>Diabetes (n = 19)<br>Eating Disorders (n = 1)<br>Frailty (n = 8)<br>Grief & Loss (n = 3)<br>Heart Disease, Hypertension, Stroke (n = 9)<br>Memory/Cognition (n = 12)<br>Mental Health (General) (n = 63)<br>Not applicable (n = 2)<br>Other <sup>3</sup> (n = 6)<br>Palliative Care (n = 6)<br>Personality Disorders (n = 1)<br>Pregnant People (n = 3)<br>Seniors (n = 19)<br>Serious Mental Illness (SMI) (n = 8)<br>Sexual Health (n = 7)<br>Suicidality (n = 9)<br>Trauma/PTSD (n = 15)<br>Veterans (n = 10) | SDOH (specified) (n = 103)<br>SDOH (unspecified) (n = 3)<br><br>Accessing community resources (n = 58)<br>Employment (n = 4)<br>Financial (n = 29)<br>Food Insecurity (n = 16)<br>Housing (n = 29)<br>Insurance issues (undocumented, etc.) (n = 9)<br>Interpersonal Violence (n = 15)<br>Legal issues (n = 4)<br>Migration/Refugee Challenges (n = 1)<br>Not applicable (n = 23)<br>Other <sup>4</sup> (n = 7)<br>Relationships (Family, Parenting) (n = 13)<br>Social Isolation (n = 13)<br>Stigmatization/Racialization (n = 4) |
| Canada (n = 22)         | Colocation (n = 16)<br>Multisite (Off-                                                                         | Collaboration but not specified (n = 11)                                                                                                                                                                                                                                                                                                     | Administrative Staff (non-leadership) (n = 2)<br>Care coordinator (n = 1)                                                                                                                                                                                                                                                                                                                                                                                                                                                                                                                                                                                                                                                                                                                                     | Addictions and Substance Use (n = 5)<br>Anxiety (n = 10)                                                                                                                                                                                                                                                                                                                                                                                                                                                                                                                                                                                                                                                                                                                           | SDOH (specified) (n = 15)<br>SDOH (unspecified) (n = 4)                                                                                                                                                                                                                                                                                                                                                                                                                                                                            |

**Comment [PS1]:** This is still in alphabetical order for the entries - if we want to make it clearer, we could break out all of the 'no mention' or 'not applicable' entries and put them at the bottom. Comment on this if you'd like me to do this, all good.

|                                |                                                                                                  |                                                                                                                                                                                                                                                                              |                                                                                                                                                                                                                                                                                                                                                                                                                                                                                                                                                                                                                                                    |                                                                                                                                                                                                                                                                                                                                                                                                                                                                                                                                                                                                                                                                                                                                                                                              |                                                                                                                                                                                                                                                                                                                                                                                                                   |
|--------------------------------|--------------------------------------------------------------------------------------------------|------------------------------------------------------------------------------------------------------------------------------------------------------------------------------------------------------------------------------------------------------------------------------|----------------------------------------------------------------------------------------------------------------------------------------------------------------------------------------------------------------------------------------------------------------------------------------------------------------------------------------------------------------------------------------------------------------------------------------------------------------------------------------------------------------------------------------------------------------------------------------------------------------------------------------------------|----------------------------------------------------------------------------------------------------------------------------------------------------------------------------------------------------------------------------------------------------------------------------------------------------------------------------------------------------------------------------------------------------------------------------------------------------------------------------------------------------------------------------------------------------------------------------------------------------------------------------------------------------------------------------------------------------------------------------------------------------------------------------------------------|-------------------------------------------------------------------------------------------------------------------------------------------------------------------------------------------------------------------------------------------------------------------------------------------------------------------------------------------------------------------------------------------------------------------|
|                                | Site) ( <i>n</i> = 5)<br>Multisite (Not stated) ( <i>n</i> = 4)<br>Not stated ( <i>n</i> = 4)    | External Referrals (Off site) ( <i>n</i> = 4)<br>Formal collaboration in team meetings ( <i>n</i> = 4)<br>Formal consultation ( <i>n</i> = 5)<br>Informal consultations ( <i>n</i> = 2)<br>Internal Referrals ( <i>n</i> = 6)<br>No mention of collaboration ( <i>n</i> = 2) | Case Manager ( <i>n</i> = 1)<br>Community Health Worker ( <i>n</i> = 1)<br>Dietitian ( <i>n</i> = 6)<br>Mental Health Provider (NOS)( <i>n</i> = 2)<br>Not stated ( <i>n</i> = 5)<br>Nurse ( <i>n</i> = 11)<br>Nurse practitioner ( <i>n</i> = 10)<br>Occupational therapist ( <i>n</i> = 2)<br>Other <sup>5</sup> ( <i>n</i> = 1)<br>Paediatrician ( <i>n</i> = 2)<br>Pharmacist ( <i>n</i> = 9)<br>Physiotherapist ( <i>n</i> = 1)<br>Primary care physician ( <i>n</i> = 13)<br>Psychiatrist ( <i>n</i> = 2)<br>Psychologist ( <i>n</i> = 7)<br>Resident/IHP <sup>*</sup> Trainee ( <i>n</i> = 2)<br>Specialist Physician (NOS) ( <i>n</i> = 1) | Caregivers ( <i>n</i> = 2)<br>Children & Youth ( <i>n</i> = 3)<br>Chronic Disease (General) ( <i>n</i> = 11)<br>Chronic Pain ( <i>n</i> = 4)<br>Complexity ( <i>n</i> = 8)<br>COVID-19 ( <i>n</i> = 3)<br>Depression ( <i>n</i> = 13)<br>Diabetes ( <i>n</i> = 4)<br>Eating Disorders ( <i>n</i> = 1)<br>Frailty ( <i>n</i> = 2)<br>Grief & Loss ( <i>n</i> = 4)<br>Heart Disease, Hypertension, Stroke ( <i>n</i> = 3)<br>Memory/Cognition ( <i>n</i> = 5)<br>Mental Health (General) ( <i>n</i> = 14)<br>Not applicable ( <i>n</i> = 2)<br>Other <sup>6</sup> ( <i>n</i> = 2)<br>Palliative Care ( <i>n</i> = 4)<br>Seniors ( <i>n</i> = 7)<br>Serious Mental Illness (SMI) ( <i>n</i> = 4)<br>Sexual Health ( <i>n</i> = 2)<br>Suicidality ( <i>n</i> = 1)<br>Trauma/PTSD ( <i>n</i> = 5) | Accessing community resources ( <i>n</i> = 7)<br>Employment ( <i>n</i> = 4)<br>Financial ( <i>n</i> = 7)<br>Food Insecurity ( <i>n</i> = 3)<br>Housing ( <i>n</i> = 6)<br>Interpersonal Violence ( <i>n</i> = 3)<br>Legal issues ( <i>n</i> = 2)<br>Not applicable ( <i>n</i> = 6)<br>Other <sup>7</sup> ( <i>n</i> = 2)<br>Relationships (Family, Parenting) ( <i>n</i> = 8)<br>Social isolation ( <i>n</i> = 2) |
| United Kingdom ( <i>n</i> = 8) | Colocation ( <i>n</i> = 3)<br>Multisite (Off-Site) ( <i>n</i> = 3)<br>Not stated ( <i>n</i> = 2) | Collaboration but not specified ( <i>n</i> = 5)<br>Formal collaboration in team meetings ( <i>n</i> = 1)<br>Formal consultation ( <i>n</i> = 1)<br>Informal consultation ( <i>n</i> = 1)<br>Internal Referrals (On site) ( <i>n</i> = 1)<br>No mention of collaboration      | Care coordinator ( <i>n</i> = 1)<br>Not stated ( <i>n</i> = 1)<br>Nurse ( <i>n</i> = 2)<br>Occupational therapist ( <i>n</i> = 2)<br>Physiotherapist ( <i>n</i> = 2)<br>Primary care physician ( <i>n</i> = 5)                                                                                                                                                                                                                                                                                                                                                                                                                                     | Anxiety ( <i>n</i> = 2)<br>Caregivers ( <i>n</i> = 1)<br>Chronic Disease (General) ( <i>n</i> = 3)<br>Complexity ( <i>n</i> = 2)<br>Depression ( <i>n</i> = 2)<br>Frailty ( <i>n</i> = 2)<br>Memory/Cognition ( <i>n</i> = 1)<br>Mental health (General) ( <i>n</i> = 2)<br>Not applicable ( <i>n</i> = 1)<br>Other <sup>8</sup> ( <i>n</i> = 2)<br>Seniors ( <i>n</i> = 3)                                                                                                                                                                                                                                                                                                                                                                                                                  | SDOH (specified) ( <i>n</i> = 4)<br><br>Accessing community resources ( <i>n</i> = 1)<br>Financial ( <i>n</i> = 3)<br>Food Insecurity ( <i>n</i> = 1)<br>Housing ( <i>n</i> = 2)<br>Legal issues ( <i>n</i> = 1)<br>Not applicable ( <i>n</i> = 3)<br>Social isolation ( <i>n</i> = 2)                                                                                                                            |

|                      |                                                                                                   |                                                                                                                                                                       |                                                                                                                                                                                                                                                                                                      |                                                                                                                                                                                                                                                                                                                                                                           |                                                                                                                                                                                                                                                                                                                                                                                                                    |
|----------------------|---------------------------------------------------------------------------------------------------|-----------------------------------------------------------------------------------------------------------------------------------------------------------------------|------------------------------------------------------------------------------------------------------------------------------------------------------------------------------------------------------------------------------------------------------------------------------------------------------|---------------------------------------------------------------------------------------------------------------------------------------------------------------------------------------------------------------------------------------------------------------------------------------------------------------------------------------------------------------------------|--------------------------------------------------------------------------------------------------------------------------------------------------------------------------------------------------------------------------------------------------------------------------------------------------------------------------------------------------------------------------------------------------------------------|
|                      |                                                                                                   | (n = 1)                                                                                                                                                               |                                                                                                                                                                                                                                                                                                      |                                                                                                                                                                                                                                                                                                                                                                           |                                                                                                                                                                                                                                                                                                                                                                                                                    |
| Spain<br>(n = 7)     | Colocation<br>(n = 6)<br>Multisite (Not<br>stated)<br>(n = 1)<br>Not stated<br>(n = 1)            | Collaboration but<br>not specified (n = 5)<br>External Referrals<br>(Off site) (n = 1)<br>Formal consultation<br>(n = 1)<br>No mention of<br>collaboration<br>(n = 1) | Midwife (n = 2)<br>Not stated (n = 1)<br>Nurse (n = 6)<br>Nurse Practitioner (n = 2)<br>Paediatrician (n = 3)<br>Physiotherapist (n = 1)<br>Primary care physician<br>(n = 5)                                                                                                                        | Anxiety (n = 2)<br>Chronic Disease (General)<br>(n = 1)<br>Complexity (n = 1)<br>COVID-19 (n = 1)<br>Depression (n = 2)<br>Mental health (General)<br>(n = 1)<br>Not applicable (n = 2)<br>Seniors (n = 1)                                                                                                                                                                | SDOH (specified) (n = 6)<br><br>Accessing community resources<br>(n = 5)<br>Employment (n = 1)<br>Financial (n = 1)<br>Housing (n = 1)<br>Interpersonal Violence (n = 2)<br>Legal issues (n = 1)<br>Migration/Refugee Challenges<br>(n = 1)<br>Not applicable (n = 1)<br>Social isolation (n = 3)<br>Stigmatization/Racialization<br>(n = 1)                                                                       |
| Australia<br>(n = 6) | Colocation<br>(n = 4)<br>Multisite (Off-<br>Site) (n = 1)<br>Multisite (Not<br>stated)<br>(n = 2) | Collaboration but<br>not specified (n = 3)<br>External Referrals<br>(Off site) (n = 2)<br>Internal Referrals<br>(On site) (n = 2)                                     | Administrative Staff (non-<br>leadership) (n = 1)<br>Dietitian (n = 2)<br>Nurse (n = 5)<br>Nurse Practitioner (n = 2)<br>Other <sup>9</sup> (n = 2)<br>Pharmacist (n = 1)<br>Primary care physician (n = 6)<br>Psychiatrist (n = 2)<br>Psychologist (n = 1)<br>Specialist Physician (NOS)<br>(n = 1) | Addictions and Substance Use<br>(n = 3)<br>Anxiety (n = 1)<br>Children & Youth (n = 1)<br>Chronic Disease (General)<br>(n = 2)<br>Complexity (n = 2)<br>Depression (n = 2)<br>Diabetes (n = 1)<br>Frailty (n = 1)<br>Grief & Loss (n = 2)<br>Mental health (General)<br>(n = 3)<br>Seniors (n = 2)<br>Sexual health (n = 3)<br>Suicidality (n = 1)<br>Trauma/PTSD (n = 2) | SDOH (specified) (n = 6)<br><br>Accessing community resources<br>(n = 3)<br>Employment (n = 1)<br>Financial (n = 1)<br>Food insecurity (n = 1)<br>Housing (n = 2)<br>Insurance (n = 1)<br>Interpersonal violence (n = 3)<br>Legal issues (n = 1)<br>Migration/Refugee Challenges<br>(n = 1)<br>Relationships (Family, Parenting)<br>(n = 2)<br>Social isolation (n = 2)<br>Stigmatization/Racialization<br>(n = 1) |
| Belgium<br>(n = 4)   | Colocation<br>(n = 2)<br>Multisite (Off-<br>Site) (n = 1)<br>Not Stated                           | Collaboration but<br>not specified (n = 1)<br>External Referrals<br>(Off site) (n = 1)<br>Formal                                                                      | Primary care physician (n = 4)<br>Health Promotor (n = 1)<br>Nurse (n = 3)<br>Nurse Practitioner (n = 1)<br>Physiotherapist (n = 2)                                                                                                                                                                  | Addictions and Substance Use<br>(n = 1)<br>Anxiety (n = 1)<br>Caregivers (n = 1)<br>Chronic Disease (General)                                                                                                                                                                                                                                                             | SDOH (specified) (n = 4)<br><br>Accessing community resources<br>(n = 3)<br>Employment (n = 2)                                                                                                                                                                                                                                                                                                                     |

|                             |                                                                    |                                                                                                                                                                                          |                                                                                                                                                                               |                                                                                                                                                                                                                                      |                                                                                                                                                                                                                                                                                                                                           |
|-----------------------------|--------------------------------------------------------------------|------------------------------------------------------------------------------------------------------------------------------------------------------------------------------------------|-------------------------------------------------------------------------------------------------------------------------------------------------------------------------------|--------------------------------------------------------------------------------------------------------------------------------------------------------------------------------------------------------------------------------------|-------------------------------------------------------------------------------------------------------------------------------------------------------------------------------------------------------------------------------------------------------------------------------------------------------------------------------------------|
|                             | ( <i>n</i> = 1)                                                    | collaboration in team meetings ( <i>n</i> = 3)<br>Formal consultation ( <i>n</i> = 3)<br>Informal consultation ( <i>n</i> = 3)<br>Internal Referrals (On site) ( <i>n</i> = 3)           | Psychologist ( <i>n</i> = 2)                                                                                                                                                  | ( <i>n</i> = 2)<br>Complexity ( <i>n</i> = 1)<br>Diabetes ( <i>n</i> = 2)<br>Mental health (General) ( <i>n</i> = 4)<br>Pregnant people ( <i>n</i> = 1)<br>Seniors ( <i>n</i> = 1)<br>Sexual health ( <i>n</i> = 1)                  | Financial ( <i>n</i> = 3)<br>Housing ( <i>n</i> = 2)<br>Migration/Refugee Challenges ( <i>n</i> = 1)<br>Relationships (Family, Parenting) ( <i>n</i> = 1)<br>Social Isolation ( <i>n</i> = 3)                                                                                                                                             |
| New Zealand ( <i>n</i> = 3) | Colocation ( <i>n</i> = 3)<br>Multisite (Off-Site) ( <i>n</i> = 1) | Formal collaboration in team meetings ( <i>n</i> = 1)<br>Formal consultation ( <i>n</i> = 2)<br>Informal consultation ( <i>n</i> = 1)                                                    | Nurse ( <i>n</i> = 3)<br>Nurse Practitioner ( <i>n</i> = 1)<br>Occupational therapist ( <i>n</i> = 1)<br>Pharmacist ( <i>n</i> = 1)<br>Primary care physician ( <i>n</i> = 3) | Chronic Disease (General) ( <i>n</i> = 3)<br>Complexity ( <i>n</i> = 3)<br>Diabetes ( <i>n</i> = 1)<br>Heart Disease, Hypertension, Stroke ( <i>n</i> = 1)<br>Mental health (General) ( <i>n</i> = 3)<br>Trauma/PTSD ( <i>n</i> = 1) | SDOH (specified) ( <i>n</i> = 3)<br><br>Accessing community resources ( <i>n</i> = 3)<br>Financial ( <i>n</i> = 2)<br>Housing ( <i>n</i> = 1)<br>Migration/Refugee Challenges ( <i>n</i> = 2)<br>Other <sup>10</sup> ( <i>n</i> = 1)<br>Relationships (Family, Parenting) ( <i>n</i> = 1)<br>Stigmatization/Racialization ( <i>n</i> = 1) |
| Sweden ( <i>n</i> = 3)      | Colocation ( <i>n</i> = 2)<br>Not stated ( <i>n</i> = 1)           | Collaboration but not specified ( <i>n</i> = 2)<br>Formal collaboration in team meetings ( <i>n</i> = 1)<br>Formal consultation ( <i>n</i> = 1)<br>Informal consultation ( <i>n</i> = 1) | Midwife ( <i>n</i> = 1)<br>Not stated ( <i>n</i> = 2)<br>Nurse ( <i>n</i> = 1)<br>Paediatrician ( <i>n</i> = 1)<br>Primary care physician ( <i>n</i> = 1)                     | Anxiety ( <i>n</i> = 1)<br>Depression ( <i>n</i> = 1)<br>Mental health (General) ( <i>n</i> = 1)<br>Not applicable ( <i>n</i> = 1)                                                                                                   | SDOH (specified) ( <i>n</i> = 3)<br><br>Accessing community resources ( <i>n</i> = 2)<br>Interpersonal violence ( <i>n</i> = 2)<br>Legal issues ( <i>n</i> = 2)                                                                                                                                                                           |
| Chile ( <i>n</i> = 2)       | Colocation ( <i>n</i> = 1)<br>Not stated ( <i>n</i> = 1)           | Collaboration but not specified ( <i>n</i> = 1)<br>External Referrals (Off site) ( <i>n</i> = 1)<br>Internal Referrals (On site) ( <i>n</i> = 1)                                         | Primary care physician ( <i>n</i> = 1)<br>Not stated ( <i>n</i> = 1)<br>Nurse Practitioner ( <i>n</i> = 1)<br>Physician Assistant ( <i>n</i> = 1)                             | Addictions and Substance Use ( <i>n</i> = 1)<br>Anxiety ( <i>n</i> = 1)<br>Depression ( <i>n</i> = 1)<br>Mental health (General) ( <i>n</i> = 1)                                                                                     | SDOH (specified) ( <i>n</i> = 1)<br><br>Interpersonal violence ( <i>n</i> = 1)<br>Not applicable ( <i>n</i> = 1)                                                                                                                                                                                                                          |

|                                 |                                                          |                                                                                                                                                                                          |                                                                                                                                                                                                              |                                                                                                                                                                                                                                                                                  |                                                                                                                                                                                                                        |
|---------------------------------|----------------------------------------------------------|------------------------------------------------------------------------------------------------------------------------------------------------------------------------------------------|--------------------------------------------------------------------------------------------------------------------------------------------------------------------------------------------------------------|----------------------------------------------------------------------------------------------------------------------------------------------------------------------------------------------------------------------------------------------------------------------------------|------------------------------------------------------------------------------------------------------------------------------------------------------------------------------------------------------------------------|
|                                 |                                                          |                                                                                                                                                                                          |                                                                                                                                                                                                              | Not applicable ( <i>n</i> = 1)                                                                                                                                                                                                                                                   |                                                                                                                                                                                                                        |
| Germany ( <i>n</i> = 2)         | Colocation ( <i>n</i> = 2)                               | Collaboration but not specified ( <i>n</i> = 2)                                                                                                                                          | Case Manager ( <i>n</i> = 1)<br>Nurse ( <i>n</i> = 2)<br>Occupational therapist ( <i>n</i> = 1)<br>Physiotherapist ( <i>n</i> = 1)<br>Primary care physician ( <i>n</i> = 2)<br>Psychologist ( <i>n</i> = 1) | Chronic Disease (General) ( <i>n</i> = 1)<br>Memory/Cognition ( <i>n</i> = 1)                                                                                                                                                                                                    | SDOH (specified) ( <i>n</i> = 2)<br><br>Accessing community resources ( <i>n</i> = 2)<br>Financial ( <i>n</i> = 1)<br>Housing ( <i>n</i> = 1)<br>Legal Issues ( <i>n</i> = 1)                                          |
| Israel ( <i>n</i> = 2)          | Not stated ( <i>n</i> = 2)                               | Collaboration but not specified ( <i>n</i> = 1)<br>No mention of collaboration ( <i>n</i> = 1)                                                                                           | Dietitian ( <i>n</i> = 1)<br>Nurse ( <i>n</i> = 2)<br>Primary care physician ( <i>n</i> = 1)<br>Psychiatrist ( <i>n</i> = 1)                                                                                 | Addictions and Substance Use ( <i>n</i> = 1)<br>Chronic Disease (General) ( <i>n</i> = 1)<br>Depression ( <i>n</i> = 1)<br>Diabetes ( <i>n</i> = 1)                                                                                                                              | SDOH (specified) ( <i>n</i> = 1)<br>SDOH (unspecified) ( <i>n</i> = 1)<br><br>Relationships (Family, Parenting) ( <i>n</i> = 1)<br>Social Isolation ( <i>n</i> = 1)                                                    |
| Mexico ( <i>n</i> = 2)          | Colocation ( <i>n</i> = 1)<br>Not stated ( <i>n</i> = 1) | Collaboration but not specified ( <i>n</i> = 2)                                                                                                                                          | Administrative Staff (non-leadership) ( <i>n</i> = 1)<br>Dietitian ( <i>n</i> = 1)<br>Nurse ( <i>n</i> = 1)<br>Other <sup>11</sup> ( <i>n</i> = 1)<br>Primary care physician ( <i>n</i> = 2)                 | Addictions and Substance Use ( <i>n</i> = 2)<br>Anxiety ( <i>n</i> = 1)<br>Chronic Disease (General) ( <i>n</i> = 1)<br>Depression ( <i>n</i> = 1)<br>Diabetes ( <i>n</i> = 1)<br>Heart Disease, Hypertension, Stroke ( <i>n</i> = 1)<br>Mental health (General) ( <i>n</i> = 1) | SDOH (specified) ( <i>n</i> = 1)<br><br>Accessing community resources ( <i>n</i> = 1)<br>Interpersonal violence ( <i>n</i> = 1)<br>Not applicable ( <i>n</i> = 1)<br>Relationships (Family, Parenting) ( <i>n</i> = 1) |
| The Netherlands ( <i>n</i> = 2) | Colocation ( <i>n</i> = 2)                               | Collaboration but not specified ( <i>n</i> = 1)<br>Formal collaboration in team meetings ( <i>n</i> = 1)<br>Formal consultation ( <i>n</i> = 1)<br>Informal consultation ( <i>n</i> = 1) | Nurse ( <i>n</i> = 2)<br>Primary care physician ( <i>n</i> = 2)<br>Psychologist ( <i>n</i> = 1)                                                                                                              | Addictions and Substance Use ( <i>n</i> = 1)<br>Caregivers ( <i>n</i> = 1)<br>Complexity ( <i>n</i> = 1)<br>Frailty ( <i>n</i> = 1)<br>Seniors ( <i>n</i> = 1)                                                                                                                   | SDOH (specified) ( <i>n</i> = 2)<br><br>Accessing community resources ( <i>n</i> = 1)<br>Financial ( <i>n</i> = 1)<br>Social Isolation ( <i>n</i> = 1)                                                                 |
| Austria ( <i>n</i> = 1)         | Colocation ( <i>n</i> = 1)                               | Collaboration but not specified                                                                                                                                                          | Nurse ( <i>n</i> = 1)<br>Primary care physician                                                                                                                                                              | Chronic Disease (General) ( <i>n</i> = 1)                                                                                                                                                                                                                                        | SDOH (specified) ( <i>n</i> = 1)                                                                                                                                                                                       |

|                         |                                                                    |                                                                                                                                                                                       |                                                                                                                                                                                                                                                                                                                                                     |                                                                                                                                                                                                                                                                                                                                         |                                                                                                                                                                                                                                                                  |
|-------------------------|--------------------------------------------------------------------|---------------------------------------------------------------------------------------------------------------------------------------------------------------------------------------|-----------------------------------------------------------------------------------------------------------------------------------------------------------------------------------------------------------------------------------------------------------------------------------------------------------------------------------------------------|-----------------------------------------------------------------------------------------------------------------------------------------------------------------------------------------------------------------------------------------------------------------------------------------------------------------------------------------|------------------------------------------------------------------------------------------------------------------------------------------------------------------------------------------------------------------------------------------------------------------|
|                         |                                                                    | ( <i>n</i> = 1)                                                                                                                                                                       | ( <i>n</i> = 1)                                                                                                                                                                                                                                                                                                                                     | Mental health (General) ( <i>n</i> = 1)                                                                                                                                                                                                                                                                                                 |                                                                                                                                                                                                                                                                  |
| Denmark ( <i>n</i> = 1) | Multisite (not stated)                                             | Formal collaboration in team meetings ( <i>n</i> = 1)                                                                                                                                 | Nurse ( <i>n</i> = 1)<br>Primary care physician ( <i>n</i> = 1)<br>Psychiatrist ( <i>n</i> = 1)                                                                                                                                                                                                                                                     | Complexity ( <i>n</i> = 1)<br>Mental health (general) ( <i>n</i> = 1)                                                                                                                                                                                                                                                                   | SDOH (specified) ( <i>n</i> = 1)<br><br>Accessing community resources ( <i>n</i> = 1)<br>Financial ( <i>n</i> = 1)                                                                                                                                               |
| Egypt ( <i>n</i> = 1)   | Not stated ( <i>n</i> = 1)                                         | External referrals (off site) ( <i>n</i> = 1)<br>Internal referrals (on site) ( <i>n</i> = 1)                                                                                         | Community health worker ( <i>n</i> = 1)<br>Nurse ( <i>n</i> = 1)<br>Primary care physician ( <i>n</i> = 1)                                                                                                                                                                                                                                          | Not applicable ( <i>n</i> = 1)                                                                                                                                                                                                                                                                                                          | SDOH (specified) ( <i>n</i> = 1)<br><br>Accessing community resources ( <i>n</i> = 1)<br>Interpersonal violence ( <i>n</i> = 1)<br>Legal issues ( <i>n</i> = 1)                                                                                                  |
| Finland ( <i>n</i> = 1) | Not stated ( <i>n</i> = 1)                                         | No mention of collaboration ( <i>n</i> = 1)                                                                                                                                           | Not stated ( <i>n</i> = 1)                                                                                                                                                                                                                                                                                                                          | Suicidality ( <i>n</i> = 1)                                                                                                                                                                                                                                                                                                             | SDOH (specified) ( <i>n</i> = 1)                                                                                                                                                                                                                                 |
| Greece ( <i>n</i> = 1)  | Colocation ( <i>n</i> = 1)                                         | External referrals (off site) ( <i>n</i> = 1)<br>Internal referrals (on site) ( <i>n</i> = 1)                                                                                         | Other <sup>12</sup> ( <i>n</i> = 1)<br>Primary care physician ( <i>n</i> = 1)<br>Volunteers ( <i>n</i> = 1)                                                                                                                                                                                                                                         | Not applicable ( <i>n</i> = 1)                                                                                                                                                                                                                                                                                                          | SDOH (specified) ( <i>n</i> = 1)<br><br>Accessing community resources ( <i>n</i> = 1)<br>Employment ( <i>n</i> = 1)<br>Financial ( <i>n</i> = 1)<br>Food insecurity ( <i>n</i> = 1)<br>Insurance ( <i>n</i> = 1)<br>Migration/refugee challenges ( <i>n</i> = 1) |
| Ireland ( <i>n</i> = 1) | Colocation ( <i>n</i> = 1)<br>Multisite (off-site) ( <i>n</i> = 1) | Formal collaboration in team meetings ( <i>n</i> = 1)<br>Formal consultation ( <i>n</i> = 1)<br>Informal consultation ( <i>n</i> = 1)<br>Internal referrals (on site) ( <i>n</i> = 1) | Administrative staff (non-leadership) ( <i>n</i> = 1)<br>Dietitian ( <i>n</i> = 1)<br>Midwife ( <i>n</i> = 1)<br>Nurse ( <i>n</i> = 1)<br>Occupational therapist ( <i>n</i> = 1)<br>Other <sup>13</sup> ( <i>n</i> = 1)<br>Physiotherapist ( <i>n</i> = 1)<br>Primary care physician ( <i>n</i> = 1)<br>Speech-language pathologist ( <i>n</i> = 1) | Anxiety ( <i>n</i> = 1)<br>Chronic disease (general) ( <i>n</i> = 1)<br>Complexity ( <i>n</i> = 1)<br>Depression ( <i>n</i> = 1)<br>Frailty ( <i>n</i> = 1)<br>Grief & loss ( <i>n</i> = 1)<br>Mental health (general) ( <i>n</i> = 1)<br>Other <sup>14</sup> ( <i>n</i> = 1)<br>Seniors ( <i>n</i> = 1)<br>Trauma/PTSD ( <i>n</i> = 1) | SDOH (specified) ( <i>n</i> = 1)<br><br>Financial ( <i>n</i> = 1)<br>Interpersonal violence ( <i>n</i> = 1)<br>Legal issues ( <i>n</i> = 1)<br>Relationships (family, parenting) ( <i>n</i> = 1)<br>Social isolation ( <i>n</i> = 1)                             |

|                               |                                                                         |                                                                                                                                                                               |                                                                                                                                                                                                        |                                                                                      |                                                                                   |
|-------------------------------|-------------------------------------------------------------------------|-------------------------------------------------------------------------------------------------------------------------------------------------------------------------------|--------------------------------------------------------------------------------------------------------------------------------------------------------------------------------------------------------|--------------------------------------------------------------------------------------|-----------------------------------------------------------------------------------|
| Italy<br>( <i>n</i> = 1)      | Colocation ( <i>n</i> = 1)                                              | Collaboration but not specified ( <i>n</i> = 1)                                                                                                                               | Primary care physician ( <i>n</i> = 1)<br>Nurse ( <i>n</i> = 1)                                                                                                                                        | Not applicable<br>( <i>n</i> = 1)                                                    | Not applicable<br>( <i>n</i> = 1)                                                 |
| Japan<br>( <i>n</i> = 1)      | Colocation ( <i>n</i> = 1)<br>Multisite (not stated)<br>( <i>n</i> = 1) | Collaboration but not specified ( <i>n</i> = 1)                                                                                                                               | Administrative staff (non-leadership)<br>( <i>n</i> = 1)<br>Nurse practitioners<br>( <i>n</i> = 1)<br>Primary care physician ( <i>n</i> = 1)                                                           | Not applicable<br>( <i>n</i> = 1)                                                    | Not applicable<br>( <i>n</i> = 1)                                                 |
| Kazakhstan<br>( <i>n</i> = 1) | Colocation ( <i>n</i> = 1)                                              | Internal referrals (on site) ( <i>n</i> = 1)                                                                                                                                  | Case manager<br>( <i>n</i> = 1)<br>Nurse ( <i>n</i> = 1)<br>Paediatrician ( <i>n</i> = 1)<br>Primary care physician ( <i>n</i> = 1)<br>Psychologist ( <i>n</i> = 1)                                    | Chronic disease (general) ( <i>n</i> = 1)<br>Mental health (general) ( <i>n</i> = 1) | SDOH (specified) ( <i>n</i> = 1)<br>Social isolation<br>( <i>n</i> = 1)           |
| Lithuania<br>( <i>n</i> = 1)  | Colocation ( <i>n</i> = 1)<br>Multisite (off-site)<br>( <i>n</i> = 1)   | External referrals (off site) ( <i>n</i> = 1)<br>Formal consultation ( <i>n</i> = 1)<br>Informal consultation ( <i>n</i> = 1)<br>Internal referrals (on site) ( <i>n</i> = 1) | Nurse ( <i>n</i> = 1)<br>Primary care physician ( <i>n</i> = 1)<br>Psychiatrist ( <i>n</i> = 1)<br>Psychologist ( <i>n</i> = 1)                                                                        | Mental health (general) ( <i>n</i> = 1)                                              | Not applicable<br>( <i>n</i> = 1)                                                 |
| Nigeria<br>( <i>n</i> = 1)    | Not stated<br>( <i>n</i> = 1)                                           | Collaboration but not specified ( <i>n</i> = 1)                                                                                                                               | Not stated<br>( <i>n</i> = 1)                                                                                                                                                                          | Not applicable ( <i>n</i> = 1)                                                       | SDOH (specified) ( <i>n</i> = 1)<br>Accessing community resources ( <i>n</i> = 1) |
| Norway<br>( <i>n</i> = 1)     | Not stated<br>( <i>n</i> = 1)                                           | Collaboration but not specified ( <i>n</i> = 1)                                                                                                                               | Case manager ( <i>n</i> = 1)<br>Psychiatrist ( <i>n</i> = 1)<br>Psychologist ( <i>n</i> = 1)                                                                                                           | Serious mental illness (SMI) ( <i>n</i> = 1)<br>Other <sup>15</sup> ( <i>n</i> = 1)  | SDOH (specified) ( <i>n</i> = 1)<br>Accessing community resources ( <i>n</i> = 1) |
| Portugal<br>( <i>n</i> = 1)   | Colocation ( <i>n</i> = 1)                                              | Formal consultation ( <i>n</i> = 1)                                                                                                                                           | Administrative staff (non-leadership)<br>( <i>n</i> = 1)<br>Nurse ( <i>n</i> = 1)<br>Nurse practitioners<br>( <i>n</i> = 1)<br>Primary care physician ( <i>n</i> = 1)<br>Psychologists ( <i>n</i> = 1) | Caregivers ( <i>n</i> = 1)<br>Memory/cognition<br>( <i>n</i> = 1)                    | Not applicable<br>( <i>n</i> = 1)                                                 |

|                           |                                         |                                                                                                                                               |                                                                 |                                     |                                                                                                                                                           |
|---------------------------|-----------------------------------------|-----------------------------------------------------------------------------------------------------------------------------------------------|-----------------------------------------------------------------|-------------------------------------|-----------------------------------------------------------------------------------------------------------------------------------------------------------|
| Rwanda<br>( <i>n</i> = 1) | Multisite (off-site)<br>( <i>n</i> = 1) | External referrals (off site) ( <i>n</i> = 1)<br>Formal collaboration in team meetings ( <i>n</i> = 1)<br>Formal consultation ( <i>n</i> = 1) | Nurse ( <i>n</i> = 1)<br>Primary care physician ( <i>n</i> = 1) | Children & youth<br>( <i>n</i> = 1) | SDOH (specified) ( <i>n</i> = 1)<br><br>Financial ( <i>n</i> = 1)<br>Food insecurity ( <i>n</i> = 1)<br>Relationships (family, parenting) ( <i>n</i> = 1) |
| Taiwan<br>( <i>n</i> = 1) | Colocation ( <i>n</i> = 1)              | Collaboration but not specified ( <i>n</i> = 1)                                                                                               | Not stated ( <i>n</i> = 1)                                      | Not applicable<br>( <i>n</i> = 1)   | Not applicable<br>( <i>n</i> = 1)                                                                                                                         |

<sup>1</sup>Other: regular training as a team, collaborating with physician to teach volunteers, collaborating by telephone contact

<sup>2</sup>Other: respiratory therapists, surgical technologists, patient service representatives, family planner, psychiatric nurse practitioner, educators, quality improvement facilitator, teachers or school administrators, recreation and vocational specialists, peer-support specialists

<sup>3</sup>Other: adverse medical outcomes, urgent psychosocial needs, homebound individuals, children with special needs NOS, persons with disabilities (*n* = 2)

<sup>4</sup>Other: transportation (*n* = 6), education, dental care

<sup>5</sup>Other: chiropractor

<sup>7</sup>Other: transportation, school context issues

<sup>6</sup>Other: insomnia, non-suicidal self injury

<sup>8</sup>Other: vulnerable adults, insomnia, physical health (general)

<sup>9</sup>Other: aboriginal health workers, interpreters

<sup>10</sup>Other: psychosocial issues including terrorism, natural disasters

<sup>11</sup>Other: physical trainer

<sup>12</sup>Other: sociologists

<sup>13</sup>Other: dentist

<sup>14</sup>Other: persons with disabilities

<sup>15</sup>Other: general medical conditions



\*Sample size of all subcategories identified in ‘Other’ categories are ( $n = 1$ ) unless otherwise noted

IHP = interdisciplinary healthcare provider, NOS = Not otherwise specified, SDOH = Social Determinants of Health

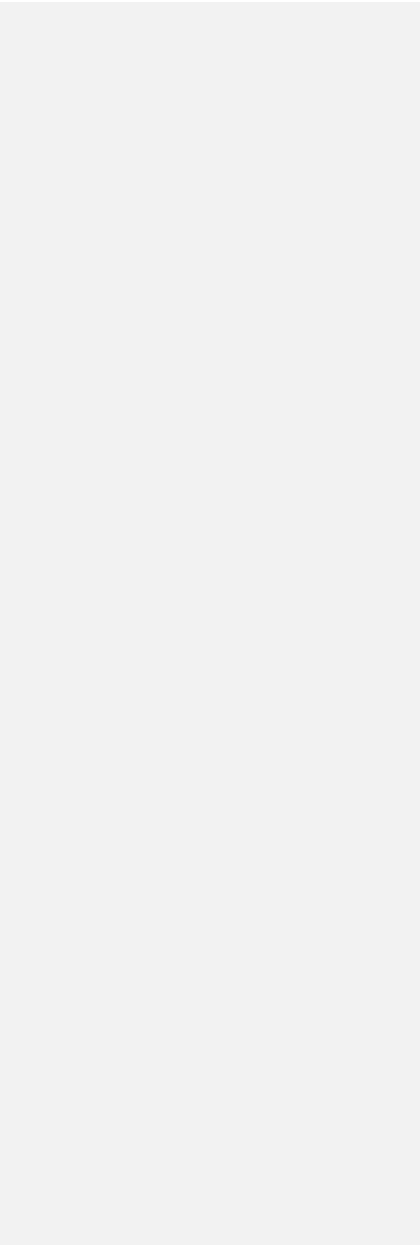

Supplement: inline-supplementary-material-3 [file inline-supplementary-material-3.pdf]
